# Supplementary material for: Prediction of Atrial Fibrillation in a Racially Diverse Cohort: The Multi‐Ethnic Study of Atherosclerosis (MESA)
Source: PubMed Central journal article supplement — J Am Heart Assoc. 2016 Feb 23;5(2):e003077. doi: 10.1161/JAHA.115.003077 (PMC4802458; doi:10.1161/jaha.115.003077), 2016-02-23

**SUPPLEMENTARY MATERIAL**

Table S1. Variables included in the risk prediction models and scores.

| CHARGE-AF                | Framingham              | CHADS2        | CHA2DS2-VASc     |
|--------------------------|-------------------------|---------------|------------------|
| Age                      | Age                     | Age           | Age              |
| Race                     | Sex                     |               | Sex              |
| Height                   | Body mass index         |               |                  |
| Weight                   |                         |               |                  |
| Smoking                  |                         |               |                  |
| Systolic blood pressure  | Systolic blood pressure | Hypertension  | Hypertension     |
| Diastolic blood pressure |                         |               |                  |
| Hypertension meds        | Hypertension meds       |               |                  |
|                          | Cardiac murmur          |               |                  |
|                          | PR interval             |               |                  |
| Diabetes                 |                         | Diabetes      | Diabetes         |
| Coronary heart disease   |                         |               |                  |
| Heart failure            | Heart failure           | Heart failure | Heart failure    |
|                          |                         | Stroke        | Stroke           |
|                          |                         |               | Vascular disease |
| hsCRP*                   |                         |               |                  |
| NT-proBNP*               |                         |               |                  |

\* Biomarker-enriched model. hsCRP: high-sensitivity C-reactive protein; NT-proBNP: N-terminal of the prohormone B-type natriuretic peptide

Table S2. Selected baseline characteristics of study participants by race/ethnicity, Multi-Ethnic Study of Atherosclerosis, 2000-2002

|                                              | Non-Hispanic<br>White | Non-Hispanic<br>Black | Hispanic  | Chinese-<br>American |
|----------------------------------------------|-----------------------|-----------------------|-----------|----------------------|
| N                                            | 2,559                 | 1,835                 | 1,477     | 792                  |
| Age, years                                   | 62 (10)               | 62 (10)               | 61 (10)   | 62 (10)              |
| Women, N (%)                                 | 1,337 (52)            | 1,010 (55)            | 762 (52)  | 408 (52)             |
| Height, cm                                   | 169 (10)              | 168 (10)              | 162 (9)   | 162 (9)              |
| Weight, kg                                   | 79 (17)               | 85 (17)               | 77 (15)   | 63 (11)              |
| Systolic BP, mmHg                            | 123 (20)              | 132 (22)              | 127 (22)  | 124 (22)             |
| Diastolic BP, mmHg                           | 70 (10)               | 75 (10)               | 72 (10)   | 72 (10)              |
| Current smoking, N (%)                       | 296 (12)              | 327 (18)              | 202 (14)  | 45 (6)               |
| Use of antihypertensive<br>medication, N (%) | 839 (33)              | 915 (50)              | 478 (32)  | 225 (28)             |
| Diabetes, N (%)                              | 151 (6)               | 321 (17)              | 259 (18)  | 102 (13)             |
| PR interval, ms                              | 164 (25)              | 171 (27)              | 162 (22)  | 165 (22)             |
| NT-proBNP, pg/mL                             | 110 (146)             | 92 (198)              | 111 (428) | 74 (109)             |
| hsCRP, mg/L                                  | 3.4 (5.1)             | 4.8 (7.0)             | 4.2 (5.6) | 1.9 (4.8)            |

Values correspond to mean (standard deviation) or N (%). BP: blood pressure; hsCRP: high-sensitivity C-reactive protein. NT-proBNP: N-terminal of the pro-hormone B-type natriuretic peptide.

Table S3. Reclassification tables adding biomarker information to the simple CHARGE-AF model, MESA 2000-2012. Cells highlighted in green correspond to correct reclassification, while those in red represent incorrect reclassification.

| <b>Reclassification table based on NT-proBNP</b>                |                          |          |       |       |
|-----------------------------------------------------------------|--------------------------|----------|-------|-------|
| <i>Participants who did not develop AF</i>                      |                          |          |       |       |
|                                                                 | With BNP                 |          |       |       |
| Without BNP                                                     | <2.5%                    | 2.5-5.0% | >5.0% | Total |
| <2.5%                                                           | 3303                     | 141      | 4     | 3448  |
| 2.5-5.0%                                                        | 346                      | 530      | 102   | 978   |
| >5.0%                                                           | 23                       | 229      | 684   | 936   |
| Total                                                           | 3672                     | 900      | 790   | 5362  |
| <i>Participants who developed AF</i>                            |                          |          |       |       |
|                                                                 | With BNP                 |          |       |       |
| Without BNP                                                     | <2.5%                    | 2.5-5.0% | >5.0% | Total |
| <2.5%                                                           | 16                       | 5        | 1     | 22    |
| 2.5-5.0%                                                        | 7                        | 16       | 7     | 30    |
| >5.0%                                                           | 0                        | 8        | 55    | 63    |
| Total                                                           | 23                       | 29       | 63    | 115   |
| <b>Reclassification table based on hsCRP</b>                    |                          |          |       |       |
| <i>Participants who did not develop AF</i>                      |                          |          |       |       |
|                                                                 | With hsCRP               |          |       |       |
| Without hsCRP                                                   | <2.5%                    | 2.5-5.0% | >5.0% | Total |
| <2.5%                                                           | 3373                     | 75       | 0     | 3448  |
| 2.5-5.0%                                                        | 85                       | 835      | 58    | 978   |
| >5.0%                                                           | 0                        | 92       | 844   | 936   |
| Total                                                           | 3458                     | 1002     | 902   | 5362  |
| <i>Participants who developed AF</i>                            |                          |          |       |       |
|                                                                 | With hsCRP               |          |       |       |
| Without hsCRP                                                   | <2.5%                    | 2.5-5.0% | >5.0% | Total |
| <2.5%                                                           | 22                       | 0        | 0     | 22    |
| 2.5-5.0%                                                        | 4                        | 23       | 3     | 30    |
| >5.0%                                                           | 0                        | 4        | 59    | 63    |
| Total                                                           | 26                       | 27       | 62    | 115   |
| <b>Reclassification table based on both NT-proBNP and hsCRP</b> |                          |          |       |       |
| <i>Participants who did not develop AF</i>                      |                          |          |       |       |
|                                                                 | With NT-proBNP and hsCRP |          |       |       |
| Without NT-proBNP and hsCRP                                     | <2.5%                    | 2.5-5.0% | >5.0% | Total |
| <2.5%                                                           | 3294                     | 149      | 5     | 3448  |
| 2.5-5.0%                                                        | 368                      | 510      | 100   | 978   |
| >5.0%                                                           | 27                       | 243      | 666   | 936   |
| Total                                                           | 3689                     | 902      | 771   | 5362  |
| <i>Participants who developed AF</i>                            |                          |          |       |       |
|                                                                 | With NT-proBNP and hsCRP |          |       |       |
| Without NT-proBNP and hsCRP                                     | <2.5%                    | 2.5-5.0% | >5.0% | Total |
| <2.5%                                                           | 16                       | 5        | 1     | 22    |
| 2.5-5.0%                                                        | 8                        | 14       | 8     | 30    |
| >5.0%                                                           | 1                        | 8        | 54    | 63    |
| Total                                                           | 25                       | 27       | 63    | 115   |

Figure S1. Mean predicted and observed 10-year risk of atrial fibrillation by deciles of predicted risk derived from Framingham model separately for whites and non-whites, Multi-Ethnic Study of Atherosclerosis, 2000-2012

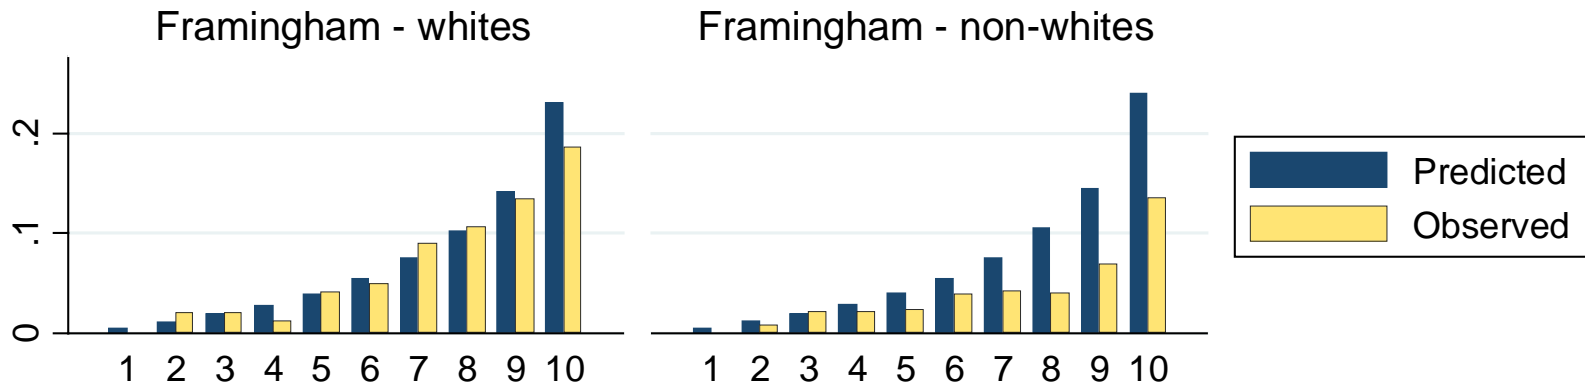

Supplement: JAH3-5-e003077-s001.pdf [file JAH3-5-e003077-s001.pdf]
